# Supplementary material for: Multi-stimuli-responsive hydrogels of gluconamide-tailored anthracene
Source: Royal Society of Chemistry journal article supplement (doi:10.1039/c9sm00656g), 2019-01-01
Supplement: c9sm00656g1.pdf [file c9sm00656g1.pdf]

## Supporting Information

### Multiple stimuli-responsive hydrogels of gluconamide-tailored anthracenes

Xun Zhang,<sup>a,†</sup> Jinguo Liu,<sup>a,†</sup> Yuxia Gao,<sup>c</sup> Jie Hao,<sup>a</sup> Jun Hu<sup>\*b</sup> and Yong Ju<sup>\*a</sup>

<sup>a</sup> Key Laboratory of Bioorganic Phosphorus Chemistry and Chemical Biology, Ministry of Education, Department of Chemistry, Tsinghua University, Beijing 100084, China. E-mail: juyong@tsinghua.edu.cn

<sup>b</sup> Beijing Advanced Innovation Center for Soft Matter Science and Engineering, Beijing University of Chemical Technology, Beijing 100029, China. E-mail: jhu@mail.buct.edu.cn

<sup>c</sup> Department of Applied Chemistry, College of Science, China Agricultural University, Beijing 100093, China.

<sup>†</sup>These authors contributed equally to this work.

### Contents

|                                                                                                      | Page |
|------------------------------------------------------------------------------------------------------|------|
| 1. Synthesis and spectra data                                                                        | S2   |
| 2. Statistic diameter of fibers in hydrogels <b>1</b> and <b>2</b>                                   | S9   |
| 3. X-ray diffraction of hydrogels <b>1</b> and <b>2</b>                                              | S9   |
| 4. Dynamic frequency sweep of $G'$ and $G''$ of hydrogels <b>1</b> and <b>2</b>                      | S9   |
| 5. TEM images of hydrogel <b>1</b> after irradiation                                                 | S10  |
| 6. $^1\text{H}$ NMR spectra of <b>2</b> before and after irradiation                                 | S10  |
| 7. Time-dependent UV-Vis spectra of <b>2</b> triggered by UV light                                   | S10  |
| 8. TEM images of hydrogel <b>1</b> with $\text{Cl}^-$ , $\text{AcO}^-$ and $\text{H}_2\text{PO}_4^-$ | S11  |
| 9. Dynamic frequency sweep of $G'$ and $G''$ of hydrogel <b>2</b> with anions                        | S11  |
| 10. Dynamic frequency sweep of $G'$ and $G''$ of hydrogels <b>1</b> /TNF and <b>2</b> /TNF           | S11  |
| 11. TEM images of hydrogels <b>1</b> /TNF and <b>2</b> /TNF                                          | S12  |

## 1. Synthesis and spectra data

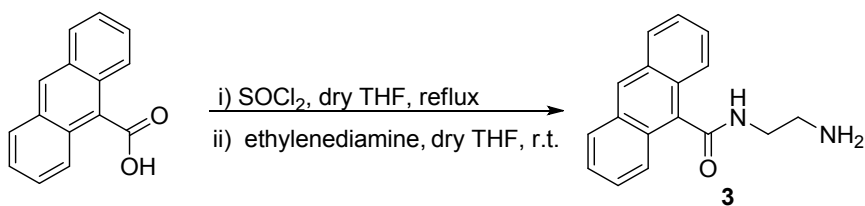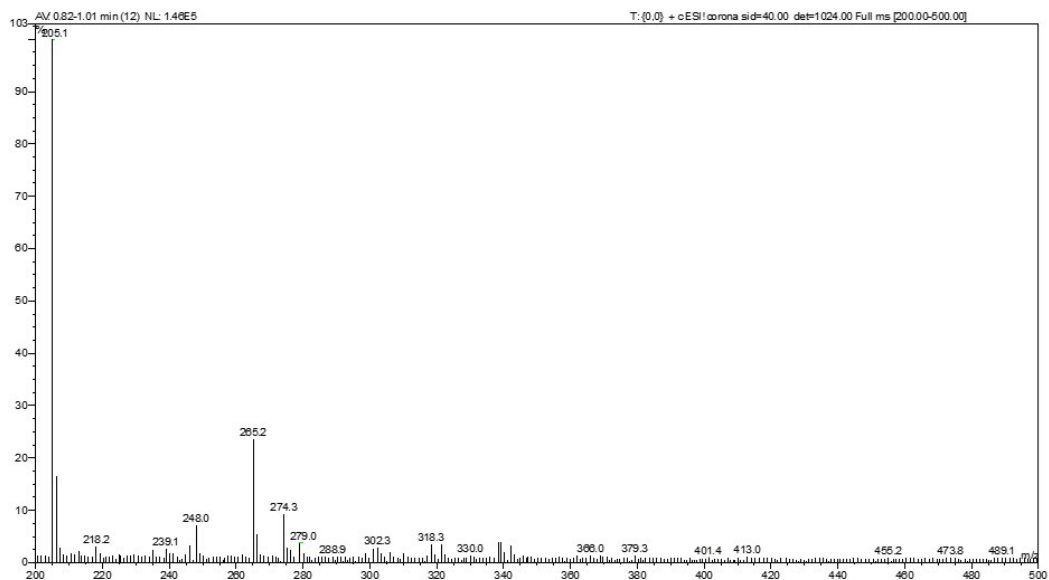

ESI-MS (+) spectrum of **3**

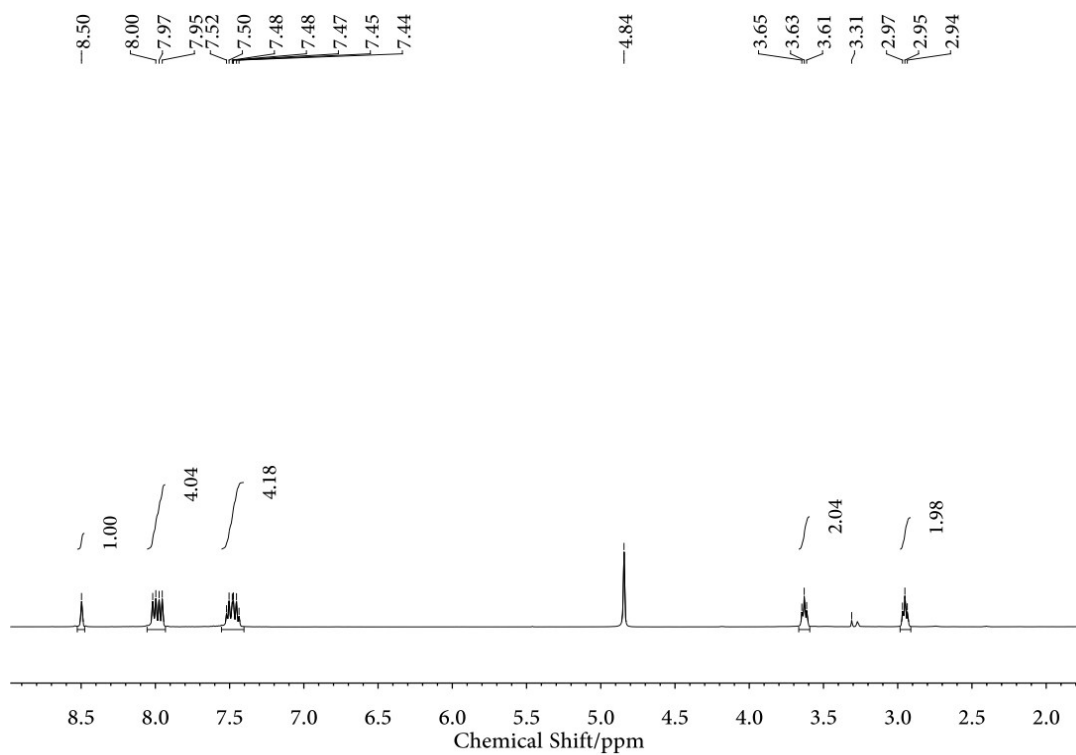

$^1\text{H}$  NMR spectrum of **3** (400 MHz,  $\text{CD}_3\text{OD}$ , ppm)

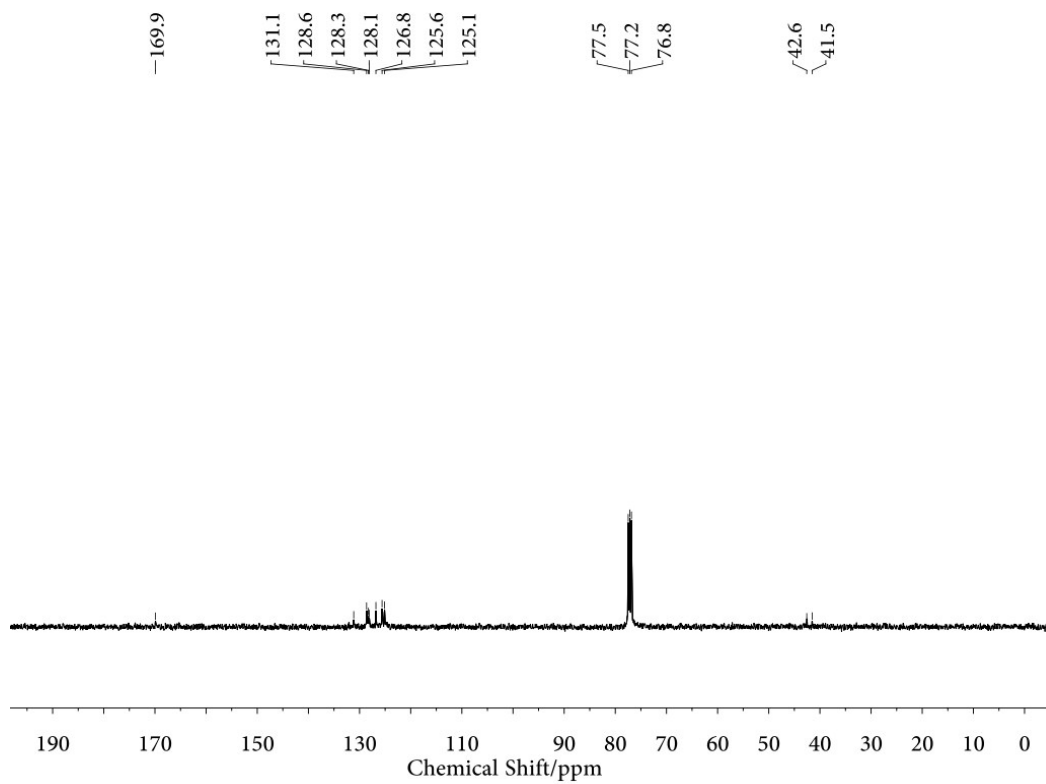

$^{13}\text{C}$  NMR spectrum of **3** (100 MHz,  $\text{CDCl}_3$ , ppm)

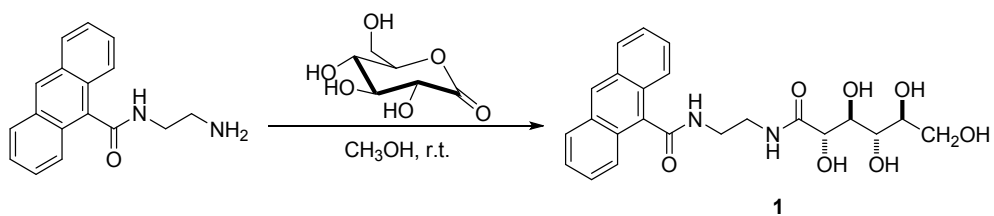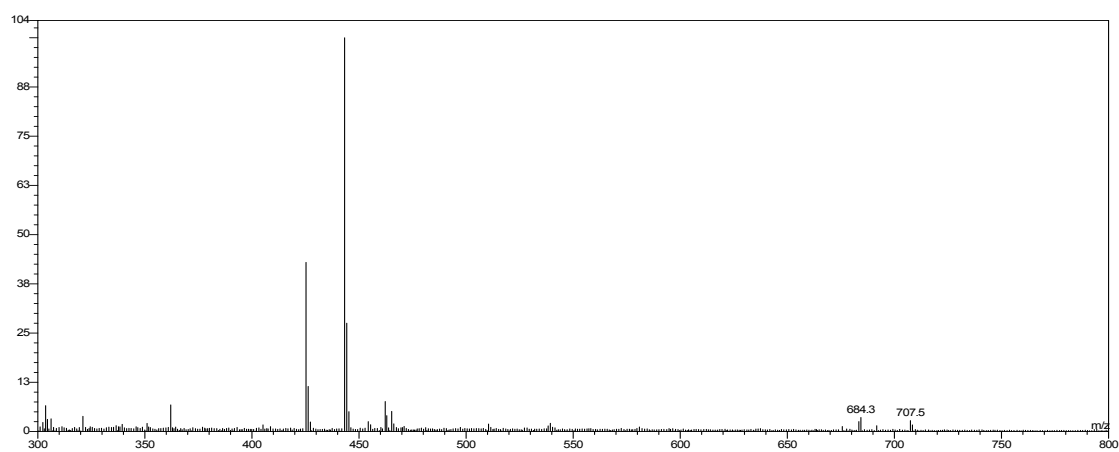

ESI-MS (+) spectrum of **1**

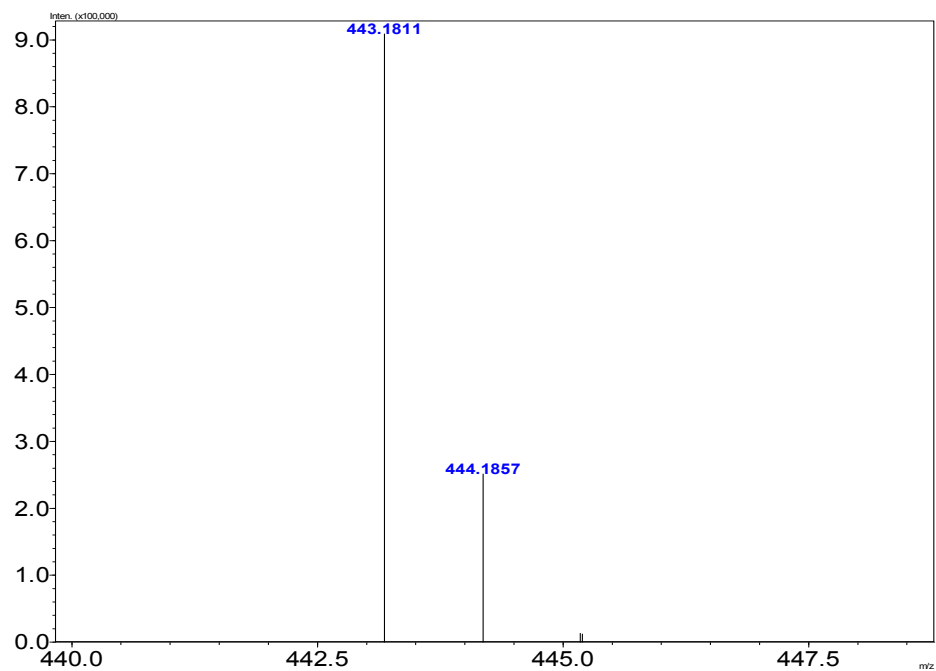

HRMS-ESI (+) spectrum of **1**

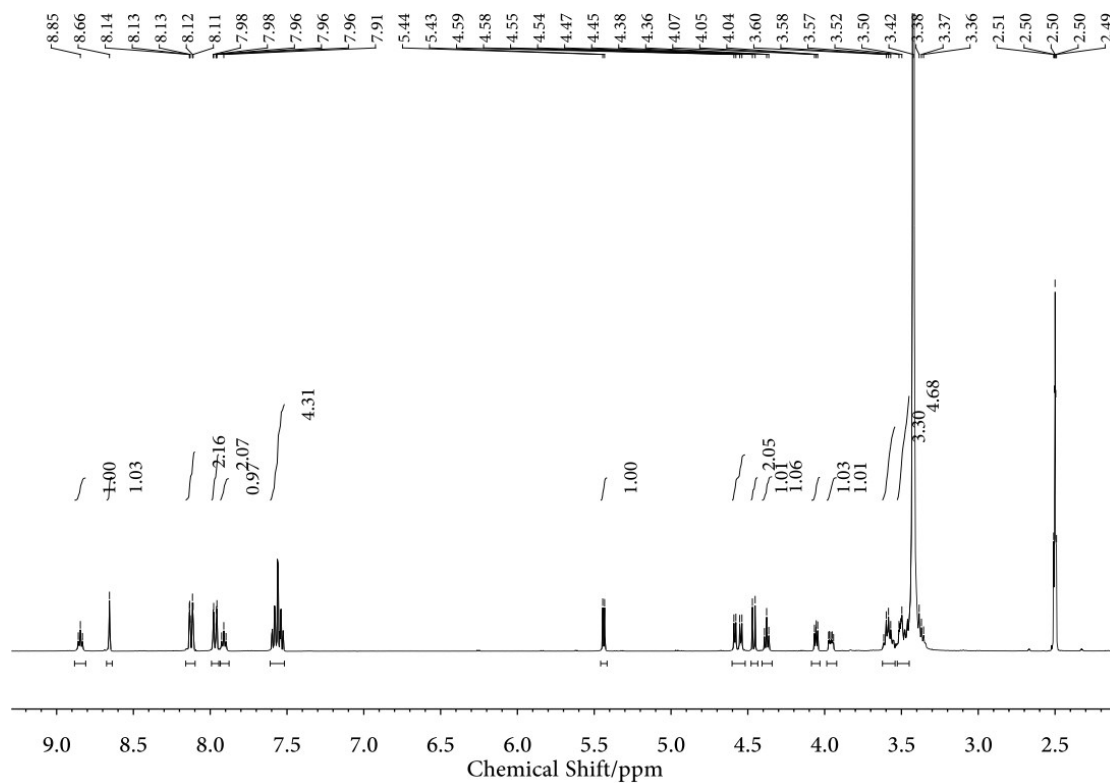

<sup>1</sup>H NMR spectrum of **1** (400 MHz, *d*<sub>6</sub>-DMSO, ppm)

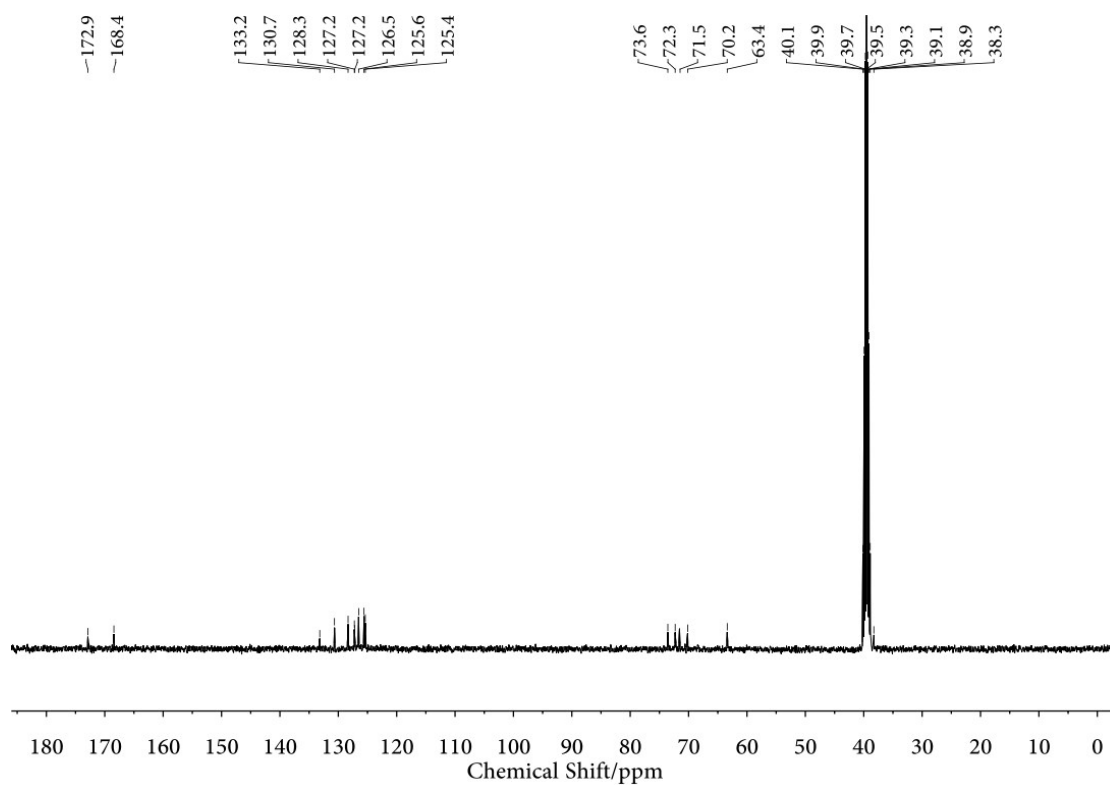

$^{13}\text{C}$  NMR spectrum of **1** (100 MHz,  $d_6$ -DMSO, ppm)

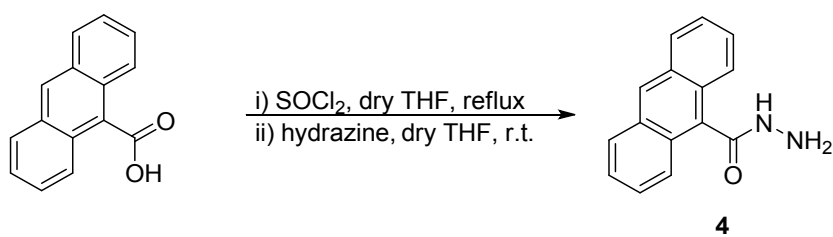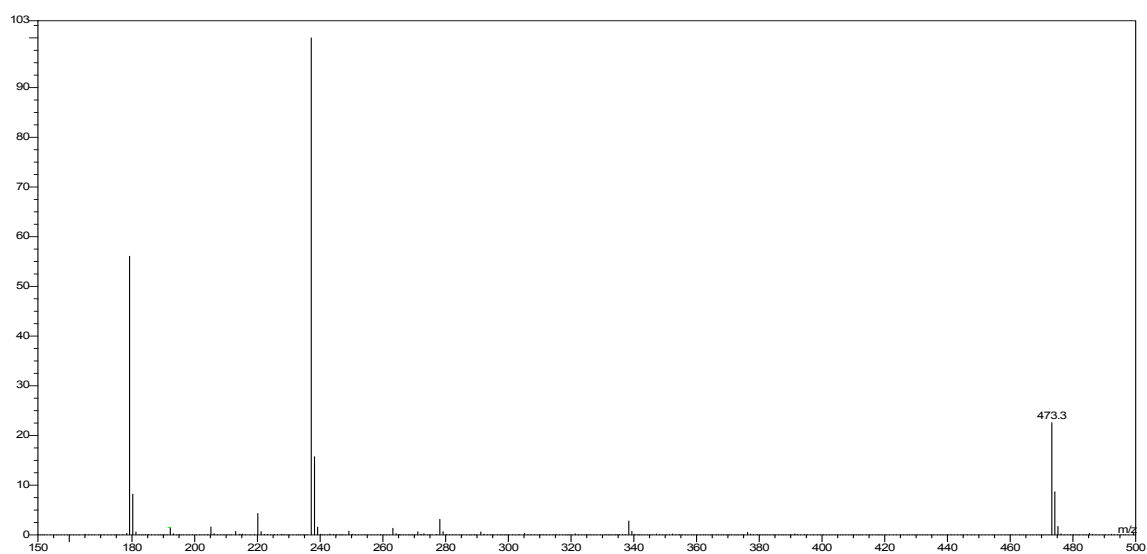

ESI-MS (+) spectrum of **4**

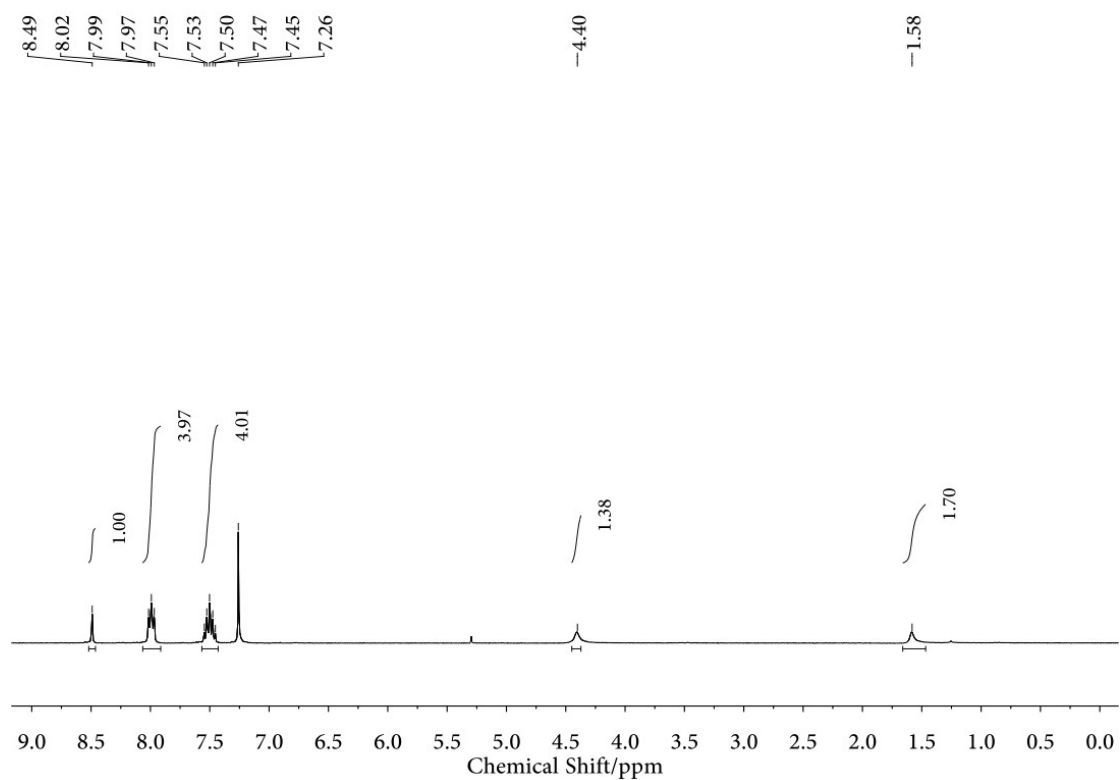

$^1\text{H}$  NMR spectrum of **4** (400 MHz,  $\text{CDCl}_3$ , ppm)

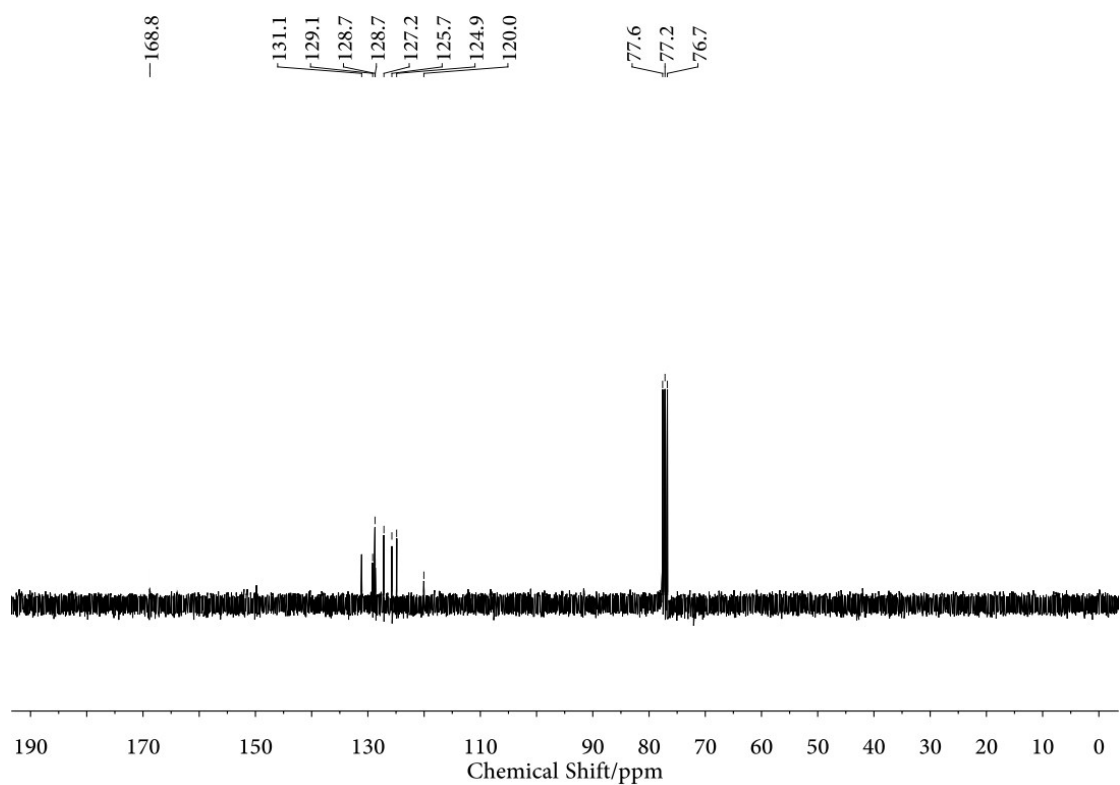

$^{13}\text{C}$  NMR spectrum of **4** (100 MHz,  $\text{CDCl}_3$ , ppm)

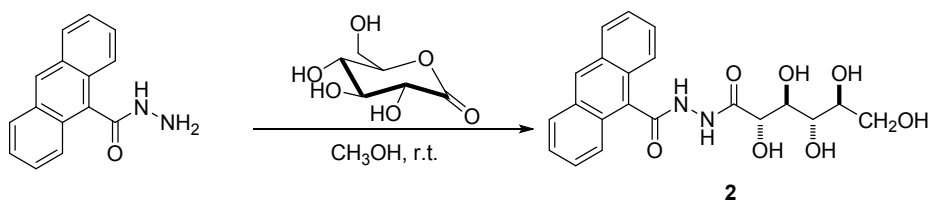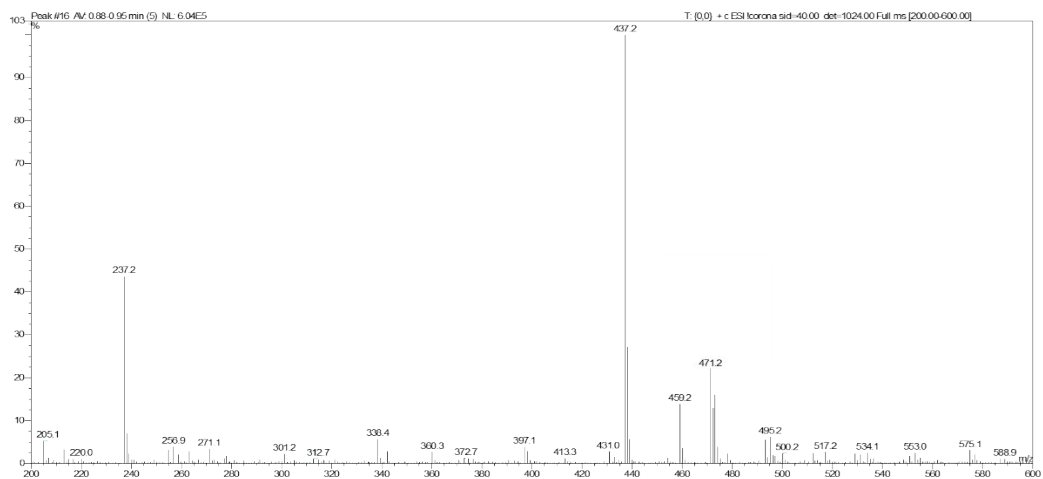

ESI-MS (+) spectrum of **2**

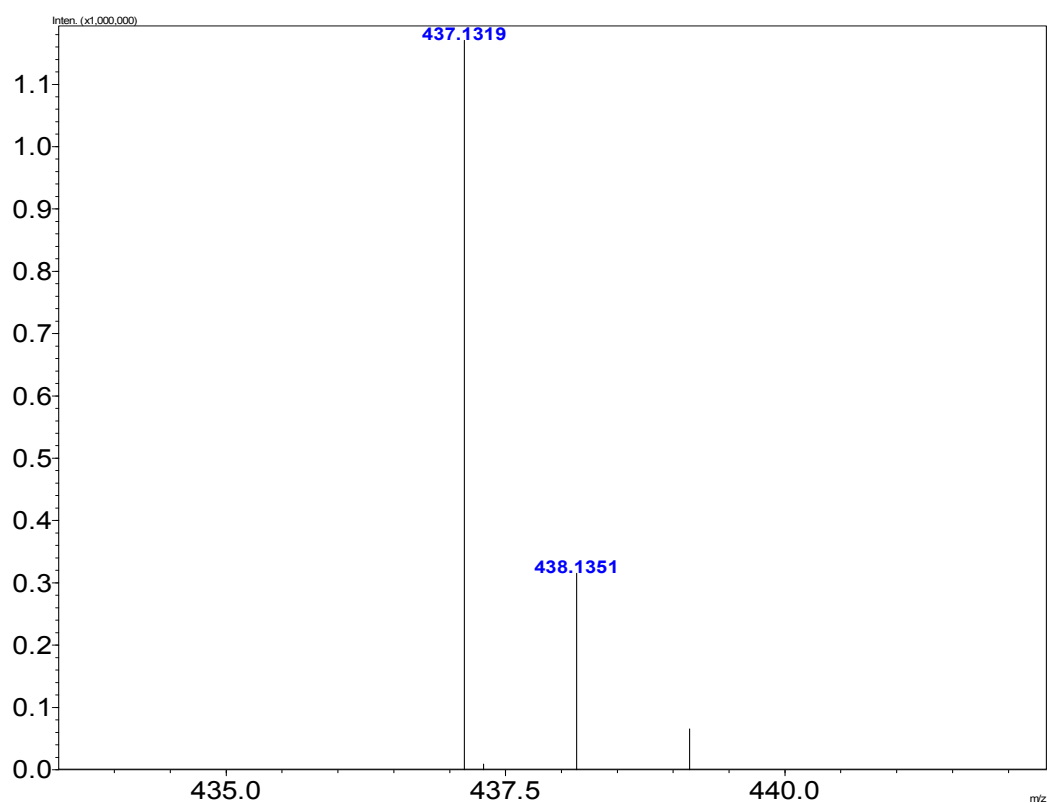

HRMS-ESI (+) spectrum of **2**

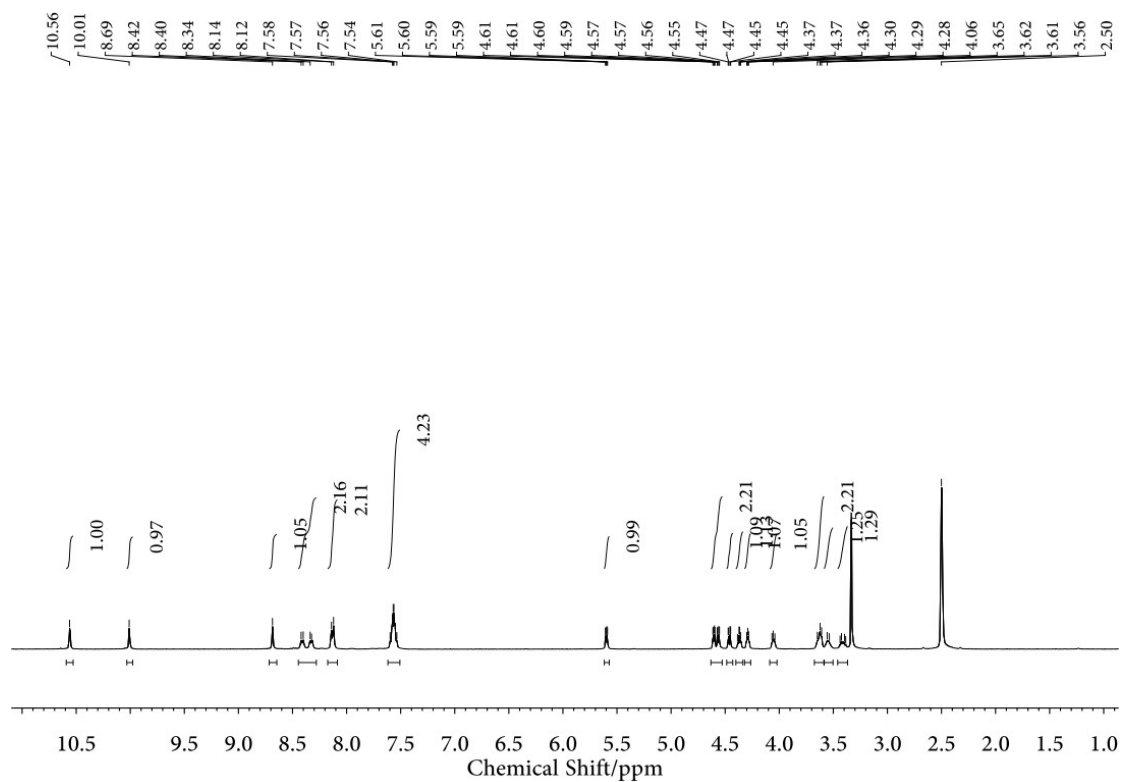

$^1\text{H}$  NMR spectrum of **2** (400 MHz,  $d_6$ -DMSO, ppm)

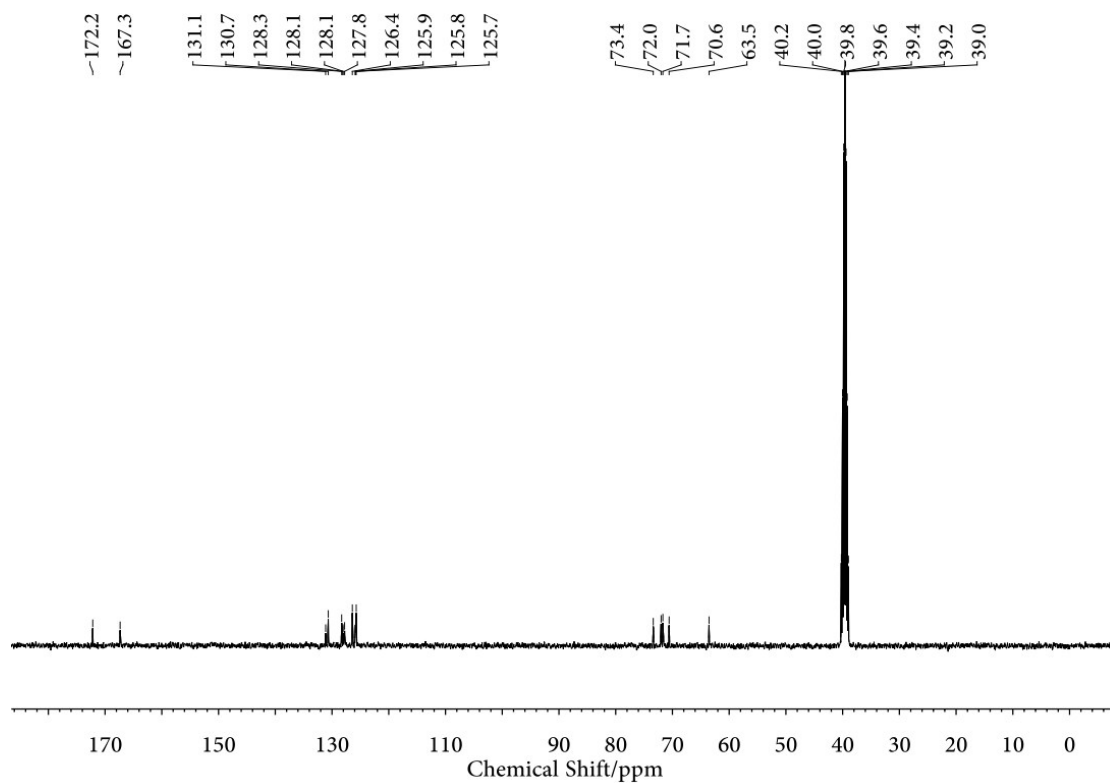

$^{13}\text{C}$  NMR spectrum of **2** (100 MHz,  $d_6$ -DMSO, ppm)



## 2. Statistic diameter of fibers in hydrogels 1 and 2

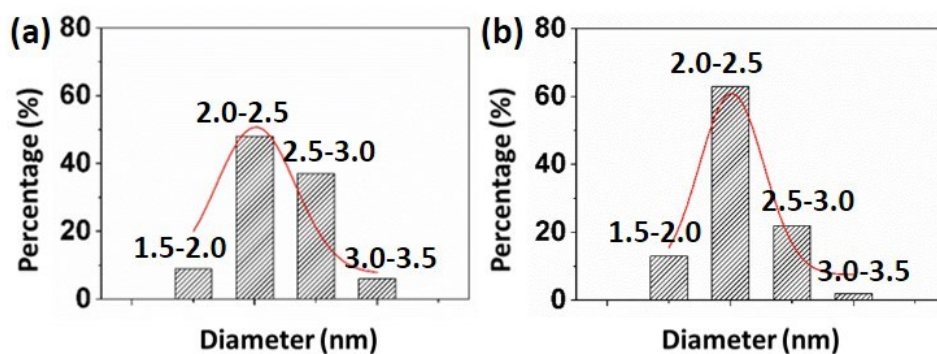

**Fig. S1** Statistic diameter of fibers in (a) hydrogel 1 and (b) hydrogel 2 (conc. of 1 = 8 mg/mL, conc. of 2 = 7 mg/mL).

## 3. X-ray diffraction of hydrogels 1 and 2

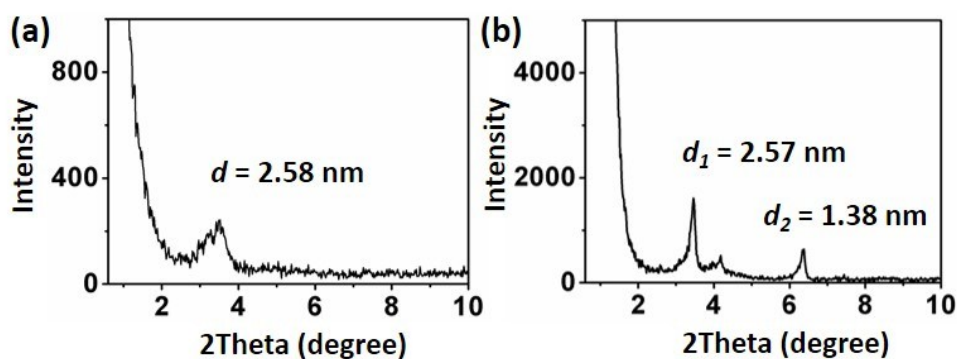

**Fig. S2** X-ray diffraction of (a) hydrogel 1 and (b) hydrogel 2 (conc. of 1 = 8 mg/mL, conc. of 2 = 7 mg/mL).

## 4. Dynamic frequency sweep of $G'$ and $G''$ of hydrogels 1 and 2

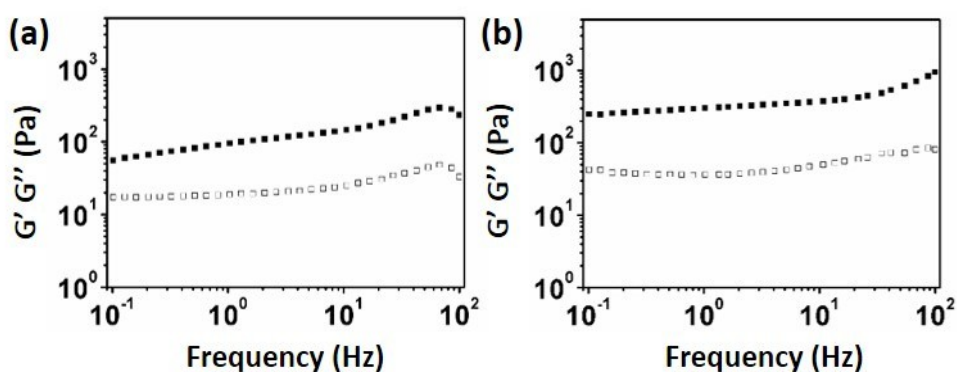

**Fig. S3** Frequency sweep of the storage modulus  $G'$  (■) and the loss modulus  $G''$  (□) of (a) hydrogel 1 and (b) hydrogel 2 (conc. of 1 = 8 mg/mL, conc. of 2 = 7 mg/mL, 2% strain is used).

## 5. TEM images of hydrogel 1 after irradiation

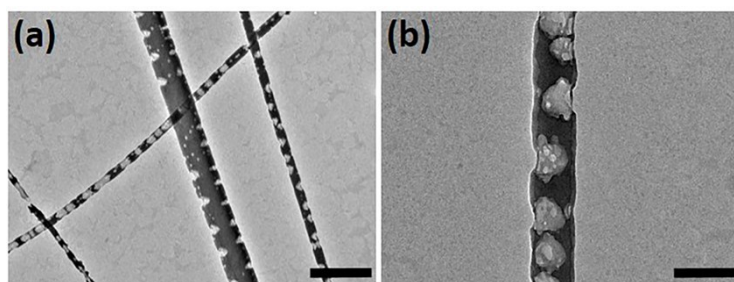

**Fig. S4** TEM images of hydrogel **1** (conc. of **1** = 8 mg/mL) after irradiation at 365 nm for 12 h. Scale bars are 1  $\mu$ m and 200 nm for (a) and (b), respectively.

## 6. $^1\text{H}$ NMR spectra of **2** before and after irradiation

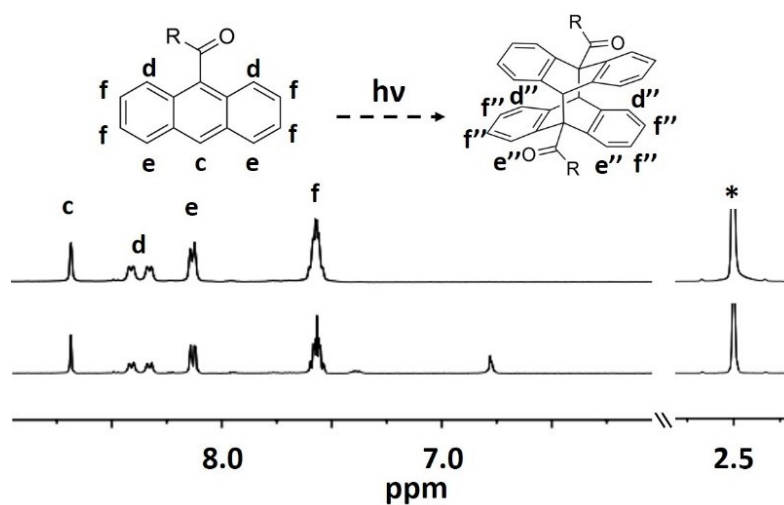

**Fig. S5**  $^1\text{H}$  NMR spectra of **2** before (top) and after (bottom) irradiation at 365 nm for 12 h. (400 MHz,  $d_6$ -DMSO, conc. of **2** = 7 mg/mL, \*represents solvent peak)

## 7. Time-dependent UV-Vis spectra of **2** triggered by UV light

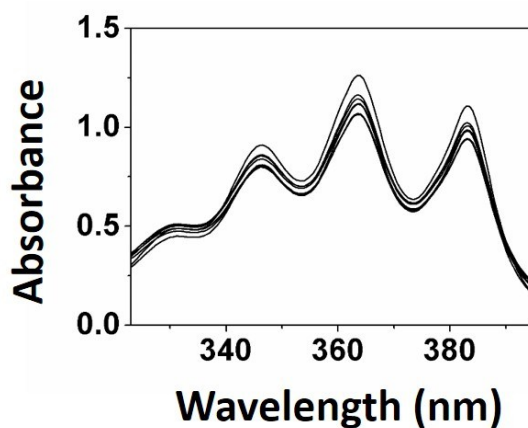

**Fig. S6** Time-dependent UV-Vis spectra of **2** triggered by UV light at 365 nm ( $\text{H}_2\text{O}$ , conc. of **2** = 0.5 mg/mL).

## 8. TEM images of hydrogel 1 with $\text{Cl}^-$ , $\text{AcO}^-$ and $\text{H}_2\text{PO}_4^-$

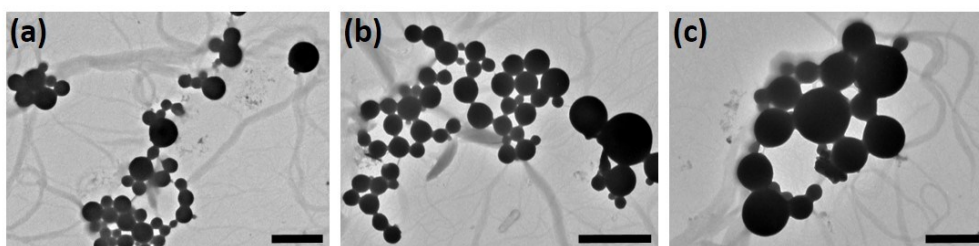

**Fig. S7** TEM images of hydrogel **1** with (a)  $\text{Cl}^-$ , (b)  $\text{AcO}^-$  and (c)  $\text{H}_2\text{PO}_4^-$ , Scale bar is 2  $\mu\text{m}$  for (a) and (b), and 1  $\mu\text{m}$  for (c) (gelator: anion = 1:4, molar ratio; conc. of **1** = 8 mg/mL).

## 9. Dynamic frequency sweep of $G'$ and $G''$ of hydrogel 2 with anions

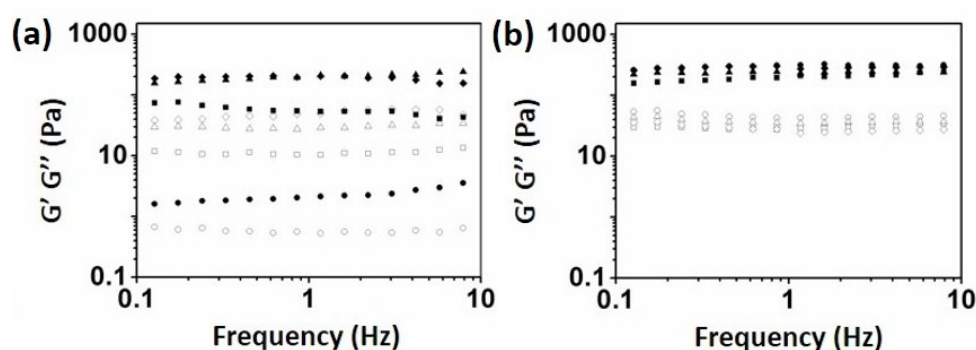

**Fig. S8** Frequency sweep of the storage modulus  $G'$  (solid) and the loss modulus  $G''$  (hollow) of hydrogel **2** ( $\blacktriangle/\triangle$ ) with (a)  $\text{Cl}^-$  ( $\blacklozenge/\lozenge$ ),  $\text{AcO}^-$  ( $\blacksquare/\square$ ),  $\text{H}_2\text{PO}_4^-$  ( $\bullet/\circ$ ) and (b)  $\text{Br}^-$  ( $\blacklozenge/\lozenge$ ),  $\text{I}^-$  ( $\blacksquare/\square$ ),  $\text{NO}_3^-$  ( $\bullet/\circ$ ) (gelator: anion = 1:4, molar ratio, conc. of **2** = 7 mg/mL).

## 10. Dynamic frequency sweep of $G'$ and $G''$ of hydrogels 1/TNF and 2/TNF

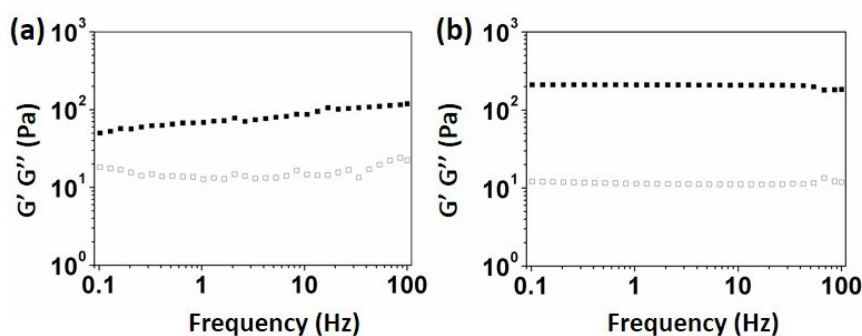

**Fig. S9** Frequency sweep of the storage modulus  $G'$  ( $\blacksquare$ ) and the loss modulus  $G''$  ( $\square$ ) of (a) hydrogel **1**/TNF (1:1 molar ratio, conc. of **1** = 8 mg/mL, 2% strain is used) and (b) hydrogel **2**/TNF (1:1 molar ratio, conc. of **2** = 7 mg/mL, 2% strain is used).

## 11. TEM images of hydrogels 1/TNF and 2/TNF

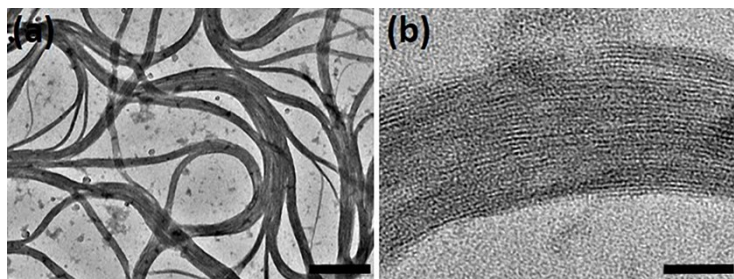

**Fig. S10** TEM images of **1/TNF** (1:1 molar ratio). Scale bar is 500 and 50 nm for (a) and (b), respectively.

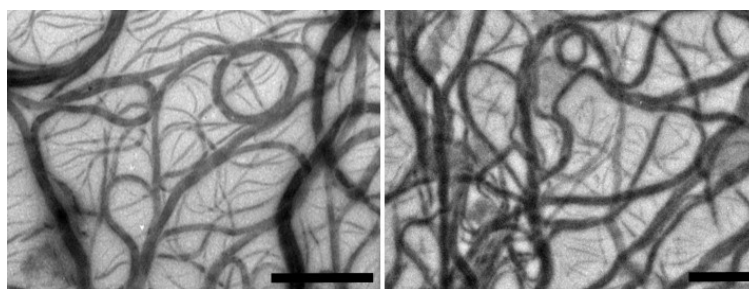

**Fig. S11** TEM images of **2/TNF** (1:1 molar ratio). Scale bar is 2  $\mu\text{m}$ .
